# Supplementary material for: A Preliminary Assessment of the ‘Greenness’ of Halide-Free Ionic Liquids—An MCDA Based Approach
Source: MDPI journal article supplement (doi:10.3390/pr9091524), 2021-08-27
Supplement: s1 [file s1]

# A Preliminary Assessment of the ‘Greenness’ of Halide-Free Ionic Liquids- An MCDA based Approach

Kranthi Kumar Maniam <sup>1</sup>, and Shiladitya Paul <sup>1,2,\*</sup><sup>1</sup> Materials Innovation Centre, School of Engineering, University of Leicester, Leicester, LE1 7RH, UK; km508@leicester.ac.uk<sup>2</sup> Materials and Structural and Integrity Technology Group, TWI, Cambridge CB21 6AL, UK.

\* Correspondence: shiladitya.paul@twi.co.uk

## 1. Materials and Methods

### 1.1. Data collection and selection of halide-free ionic liquids

Firstly, a dataset of 193 halide-free ILs (HF-ILs) consisting of a combination of imidazolium, pyrrolidinium, pyridinium, piperidinium cations and carboxylic acid (acetic acid, propionic acid, butyric acid), alkyl sulfate (methyl, ethyl), sulfonate (methane, ethane) anions was prepared for analysis. Since the primary focus was on the development of halide free ILs for electroplating, CO<sub>2</sub> reduction, other electrochemical processes, alkyl groups for the cations were restricted upto butyl. Increasing the cationic chain length with higher alkyl group will increase the viscosity drastically and affect the overall performance. A combination of commercially available HF-ILs and HF-ILs designed through machine learning methods (artificial intelligence) were chosen for the analysis. The cation-anion combinations for HF-ILs are chosen considering the guidelines on selection of safer ILs by Costa et al.[1]. Since the safety data on the commercially available HF-ILs, designed HF-ILs are quite limited, safety information on the raw materials that are used for the synthesis are collected. The raw materials that are required for the synthesis of HF-ILs are taken from the literature [2–23]. Table S1 lists the details of the HF-ILs and their corresponding raw materials that have been used to synthesise the HF-ILs. As can be seen, few of the commercially available ILs are also used as the raw materials for the synthesis of HF-ILs. Unfortunately, the properties of HF-ILs are not fully defined, thus there is lot of missing information. Data for the missing information for the commercially available HF-ILs are filled with the data based on the raw materials that have been used for the synthesis of HF-ILs. Safety data sheets (SDS), research publications, The European Chemicals Agency (ECHA) register database[24], Pubchem[25], Chempidder[26] and the European Commission based projects were used as the sources to extract the information to the maximum possible. Additionally, few conventional organic solvents were also included in the list.

**Citation:** Maniam, K.K.; Paul, S. A Preliminary Assessment of the ‘Greenness’ of Halide-Free Ionic Liquids- an MCDA Based Approach. *Processes* **2021**, *9*, 1524. <https://doi.org/10.3390/pr9091524>

Academic Editor: Weize Wu

Received: 2 August 2021

Accepted: 24 August 2021

Published: 27 August 2021

**Publisher’s Note:** MDPI stays neutral with regard to jurisdictional claims in published maps and institutional affiliations.

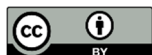

**Copyright:** © 2021 by the authors. Submitted for possible open access publication under the terms and conditions of the Creative Commons Attribution (CC BY) license (<http://creativecommons.org/licenses/by/4.0/>).

**Table S1.** Table lists the HF-ILs selected for analysis in this work and their corresponding raw materials.

| S.No | Name of the Ionic Liquid                                                       | Raw Materials/Ionic Liquids                                                |
|------|--------------------------------------------------------------------------------|----------------------------------------------------------------------------|
| 1    | 1-ethyl-3-methylimidazolium acetate                                            | 1-ethyl-3-methyl imidazolium acetate                                       |
| 2    | 1,3-dimethyl imidazolium acetate                                               | 1,3-dimethyl imidazolium chloride; acetic acid                             |
| 3    | 1,3-diethyl imidazolium acetate<br>(1-ethyl-3-ethyl imidazolium acetate)       | formaldehyde; ethyl amine; glyoxal; acetic acid                            |
| 4    | 1-propyl-3-methyl imidazolium acetate                                          | 1-propyl-3-methylimidazolium chloride; acetic acid; methanol; acetonitrile |
| 5    | 1-butyl-3-methyl imidazolium acetate                                           | 1-butyl-3-methylimidazolium acetate                                        |
| 6    | 1-ethyl-2,3-dimethyl imidazolium acetate                                       | 1-methyl imidazole; chloroethane; acetic acid                              |
| 7    | 1-butyl-2,3-dimethyl imidazolium acetate                                       | 1-methyl imidazole; chlorobutane; acetic acid                              |
| 8    | Pyridinium acetate                                                             | Pyridine; acetic acid                                                      |
| 9    | 1-ethyl pyridinium acetate                                                     | 1-ethyl pyridinium chloride; acetic acid                                   |
| 10   | 1-butyl pyridinium acetate                                                     | 1-butyl pyridinium chloride; acetic acid                                   |
| 11   | 1-propyl-1-methyl piperidinium acetate                                         | 1-methyl piperidine; chloropropane; acetic acid                            |
| 12   | 1-butyl-1-methyl piperidinium acetate                                          | 1-methyl piperidine; chlorobutane; sodium acetate                          |
| 13   | 1-ethyl-3-methyl pyridinium acetate                                            | 1-ethyl-3-methyl pyridinium bromide; acetic acid                           |
| 14   | 1-propyl-3-methyl pyridinium acetate                                           | 3-methyl pyridine (3-Picoline); chloropropane; acetic acid                 |
| 15   | 1-butyl-2-methyl pyridinium acetate                                            | 1-butyl-2-methylpyridinium chloride; acetic acid                           |
| 16   | 1-butyl-3-methyl pyridinium acetate                                            | 4-methyl pyridine (4-Picoline); chlorobutane; acetic acid                  |
| 17   | 1-butyl-4-methyl pyridinium acetate                                            | 1-butyl-4-methyl pyridinium chloride; acetic acid                          |
| 18   | 1-methyl pyrrolidinium acetate                                                 | N-methyl pyrrolidine (1-methyl pyrrolidine); acetic acid                   |
| 19   | 1-butyl-1-methyl pyrrolidinium acetate                                         | N-methyl pyrrolidine (1-methyl pyrrolidine); chlorobutane; acetic acid     |
| 20   | 1,1,3,3-tetramethyl guanidinium acetate                                        | 1,1,3,3-tetramethyl guanidine; acetic acid                                 |
| 21   | 1-methyl imidazolium acetate                                                   | 1-methyl imidazole; acetic acid                                            |
| 22   | 1-ethyl imidazolium acetate                                                    | 1-ethyl imidazole; acetic acid                                             |
| 23   | 1-propyl imidazolium acetate                                                   | 1-propyl imidazole; acetic acid                                            |
| 24   | 1-butyl imidazolium acetate                                                    | imidazole; chlorobutane; acetic acid                                       |
| 25   | Choline acetate                                                                | cholinium hydroxide; acetic acid                                           |
| 26   | 1-ethyl-3-methyl imidazolium propionate                                        | 1-ethyl-3-methyl imidazolium propionate                                    |
| 27   | 1-butyl-3-methyl imidazolium propionate                                        | 1-methyl imidazole; chlorobutane; propionic acid                           |
| 28   | 1,3-dimethyl imidazolium propionate (1-methyl-3-methyl imidazolium propionate) | 1,3-dimethylimidazolium chloride; propionic acid                           |
| 29   | 1,3-diethyl imidazolium propionate (1-ethyl-3-ethyl imidazolium propionate)    | formaldehyde; ethyl amine; glyoxal; propionic acid                         |
| 30   | 1,3-dibutyl imidazolium propionate (1-butyl-3-butyl imidazolium propionate)    | 1-butyl imidazole; chlorobutane; propionic acid                            |
| 31   | 1-propyl-3-methyl imidazolium propionate                                       | 1-methyl imidazole; chloropropane; propionic acid                          |
| 32   | 1-ethyl-2,3-dimethyl imidazolium propionate                                    | 1-methyl imidazole; chloroethane; propionic acid                           |
| 33   | 1-butyl-2,3-dimethyl imidazolium propionate                                    | 1-methyl imidazole; chlorobutane; propionic acid                           |
| 34   | Pyridinium propionate                                                          | Pyridine; propionic acid                                                   |
| 35   | 1-ethyl pyridinium propionate                                                  | 1-ethyl pyridinium chloride; propionic acid                                |
| 36   | 1-butyl pyridinium propionate                                                  | 1-butyl pyridinium chloride; propionic acid                                |
| 37   | 1-propyl-1-methyl piperidinium propionate                                      | 1-methyl piperidine; chloropropane; propionic acid                         |
| 38   | 1-ethyl-3-methyl pyridinium propionate                                         | 1-ethyl-3-methyl pyridinium bromide; propionic acid                        |

|    |                                                                               |                                                                                        |
|----|-------------------------------------------------------------------------------|----------------------------------------------------------------------------------------|
| 39 | 1-propyl-3-methyl pyridinium propionate                                       | 3-methyl pyridine (3-Picoline); chloropropane; propionic acid                          |
| 40 | 1-butyl-3-methyl pyridinium propionate                                        | 3-methyl pyridine (3-Picoline); chlorobutane; propionic acid                           |
| 41 | 1-butyl-4-methyl pyridinium propionate                                        | 1-butyl-4-methyl pyridinium chloride; propionic acid                                   |
| 42 | 1-butyl-1-methyl pyrrolidinium propionate                                     | 1-butyl-1-methyl pyrrolidinium chloride; propionic acid                                |
| 43 | 1,1,3,3-tetramethyl guanidinium propionate                                    | 1,1,3,3-tetramethyl guanidine; propionic acid                                          |
| 44 | Methyl propionate                                                             | chloromethane; propionic acid                                                          |
| 45 | Cholinium propionate                                                          | Cholinium hydroxide; propionic acid                                                    |
| 46 | 1-methyl-2-pyrrolidinium propionate                                           | 1-methyl pyrrolidine; propionic acid                                                   |
| 47 | 1-ethyl-3-methyl imidazolium butyrate                                         | 1-ethyl-3-methylimidazolium chloride; butyric acid                                     |
| 48 | 1,3-dimethyl imidazolium butyrate<br>(1-methyl-3-methyl imidazolium butyrate) | 1,3-dimethyl imidazolium chloride; butyric acid                                        |
| 49 | 1,3-diethyl imidazolium butyrate<br>(1-ethyl-3-ethylimidazolium butyrate)     | formaldehyde; ethyl amine; glyoxal; butyric acid                                       |
| 50 | 1-propyl-3-methyl imidazolium butyrate                                        | 1-propyl-3-methylimidazolium chloride; butyric acid                                    |
| 51 | 1-butyl-3-methyl imidazolium butyrate                                         | 1-Butyl-3-methylimidazolium chloride; butyric acid                                     |
| 52 | 1-ethyl-2,3-dimethyl imidazolium butyrate                                     | 1-methyl imidazole; chloroethane; butyric acid                                         |
| 53 | 1-butyl-2,3-dimethyl imidazolium butyrate                                     | 1-methyl imidazole; chlorobutane; butyric acid                                         |
| 54 | 1-ethyl pyridinium butyrate                                                   | 1-ethyl pyridinium chloride; butyric acid                                              |
| 55 | 1-butyl pyridinium butyrate                                                   | 1-butyl pyridinium chloride; butyric acid                                              |
| 56 | 1-propyl-1-methyl piperidinium butyrate                                       | 1-methyl piperidine; chloropropane; butyric acid                                       |
| 57 | 1-ethyl-3-methyl pyridinium butyrate                                          | 1-ethyl-3-methyl pyridinium bromide; butyric acid                                      |
| 58 | 1-propyl-3-methyl pyridinium butyrate                                         | 3-methyl pyridine (3-Picoline); chloropropane; acetic acid                             |
| 59 | 1-butyl-3-methyl pyridinium butyrate                                          | 1-Butyl-3-methyl pyridinium chloride; butyric acid                                     |
| 60 | 1-butyl-4-methyl pyridinium butyrate                                          | 1-Butyl-4-methyl pyridinium chloride; butyric acid                                     |
| 61 | 1-butyl-1-methyl pyrrolidinium butyrate                                       | 1-Butyl-1-methyl pyrrolidinium chloride; butyric acid                                  |
| 62 | 1,1,3,3-tetramethyl guanidinium butyrate                                      | 1,1,3,3-tetramethyl guanidine; butyric acid                                            |
| 63 | Cholinium butyrate                                                            | cholinium hydroxide; butyric acid                                                      |
| 64 | 1-ethyl-3-methyl imidazolium bisulfate                                        | 1-ethyl-3-methylimidazolium bisulfate                                                  |
| 65 | 1,3-dimethyl imidazolium bisulfate                                            | formaldehyde; methyl amine; glyoxal; Sulfuric acid                                     |
| 66 | 1,3-diethyl imidazolium bisulfate                                             | formaldehyde; ethyl amine; glyoxal; sulfuric acid                                      |
| 67 | 1-propyl-3-methyl imidazolium bisulfate                                       | 1-propyl-3-methyl imidazolium chloride; sodium bisulfate                               |
| 68 | 1-butyl-3-methyl imidazolium bisulfate                                        | 1-butyl-3-methyl imidazolium bisulfate (1-butyl-3-methyl imidazolium hydrogen sulfate) |
| 69 | 1-ethyl-2,3-dimethyl imidazolium bisulfate                                    | 1-methyl imidazole; chloroethane; sodium bisulfate                                     |
| 70 | 1-butyl-2,3-dimethyl imidazolium bisulfate                                    | 1-methyl imidazole; chlorobutane; sodium bisulfate                                     |
| 71 | 1-ethyl pyridinium bisulfate                                                  | 1-butyl pyridinium chloride; Sodium bisulfate                                          |
| 72 | 1-butyl pyridinium bisulfate                                                  | 1-ethyl pyridinium chloride; Sodium bisulfate                                          |
| 73 | 1-propyl-1-methyl piperidinium bisulfate                                      | 1-methyl piperidine; chloropropane; Sodium bisulfate                                   |
| 74 | 1-ethyl-3-methyl pyridinium bisulfate                                         | 1-ethyl-3-methyl pyridinium bromide; sodium bisulfate                                  |
| 75 | 1-propyl-3-methyl pyridinium bisulfate                                        | 1-methyl-3-propyl pyridinium bromide; Sodium bisulfate                                 |
| 76 | 1-butyl-3-methyl pyridinium bisulfate                                         | 1-butyl-3-methylpyridinium chloride; sodium bisulfate                                  |
| 77 | 1-butyl-4-methyl pyridinium bisulfate                                         | 1-butyl-4-methyl pyridinium chloride; sodium bisulfate                                 |
| 78 | 1-butyl-1-methyl pyrrolidinium bisulfate                                      | 1-butyl-1-methyl pyrrolidinium chloride; sodium bisulfate                              |
| 79 | 1,1,3,3-tetramethyl guanidinium bisulfate                                     | 1,1,3,3-Tetramethyl guanidine; Sulfuric acid                                           |

|     |                                                                                              |                                                                                             |
|-----|----------------------------------------------------------------------------------------------|---------------------------------------------------------------------------------------------|
| 80  | 1-methyl imidazolium hydrogen sulfate                                                        | 1-methylimidazolium hydrogen sulfate                                                        |
| 81  | 1-ethyl-3-methyl imidazolium methyl sulfate                                                  | 1-ethyl-3-methyl imidazolium methyl sulfate                                                 |
| 82  | 1,3-dimethyl imidazolium methyl sulfate<br>(1-methyl-3-methylimidazolium methyl sulfate)     | 1-methyl imidazole; dimethyl sulfate                                                        |
| 83  | 1,3-diethyl imidazolium methyl sulfate                                                       | 1-ethyl imidazole; dimethyl sulfate                                                         |
| 84  | 1-propyl-3-methyl imidazolium methyl sulfate                                                 | 1-propyl imidazole; dimethyl sulfate                                                        |
| 85  | 1-butyl-3-methyl imidazolium methyl sulfate                                                  | 1-butyl imidazole; dimethyl sulfate                                                         |
| 86  | 1-ethyl-2,3-dimethyl imidazolium methyl sulfate                                              | 1-ethyl imidazole; chloromethane; dimethyl sulfate                                          |
| 87  | 1-butyl-2,3-dimethyl imidazolium methyl sulfate                                              | 1-butyl imidazole; chloromethane; dimethyl sulfate                                          |
| 88  | 1-methyl pyridinium methyl sulfate                                                           | Pyridine; dimethyl sulfate                                                                  |
| 89  | 1,3-dimethyl pyridinium methyl sulfate                                                       | 3-methyl pyridine (3-Picoline); dimethyl sulfate                                            |
| 90  | 2-ethyl-1-methyl pyridinium methyl sulfate                                                   | 2-ethyl pyridine; dimethyl sulfate                                                          |
| 91  | 1,1-dimethyl piperidinium methyl sulfate                                                     | 1-methyl piperidine; dimethyl sulfate                                                       |
| 92  | 1-ethyl-3-methyl pyridinium methyl sulfate                                                   | 3-butyl pyridine; dimethyl sulfate                                                          |
| 93  | 1-propyl-3-methyl pyridinium methyl sulfate                                                  | Pyridine; 1-chloropropane; dimethyl sulfate                                                 |
| 94  | 1-butyl-3-methyl pyridinium methyl sulfate                                                   | 3-butyl pyridine; dimethyl sulfate                                                          |
| 95  | 1-butyl-4-methyl pyridinium methyl sulfate                                                   | 1-butyl pyridinium chloride; dimethyl sulfate                                               |
| 96  | 1,1-dimethyl pyrrolidinium methyl sulfate                                                    | N-methylpyrrolidine (1-methyl pyrrolidine); dimethyl sulfate                                |
| 97  | 1-ethyl-1-methyl pyrrolidinium methyl sulfate                                                | N-ethylpyrrolidine(1-ethylpyrrolidine); dimethyl sulfate                                    |
| 98  | 1-propyl-1-methyl pyrrolidinium methyl sulfate                                               | 1-propyl pyrrolidine; dimethyl sulfate                                                      |
| 99  | 1-butyl-1-methyl pyrrolidinium methyl sulfate                                                | 1-Butylpyrrolidine; dimethyl sulfate                                                        |
| 100 | 1,2,3-trimethyl imidazolium methyl sulfate                                                   | 1,2,3-Trimethyl imidazolium methyl sulfate                                                  |
| 101 | 1-ethyl-3-methyl imidazolium ethyl sulfate                                                   | 1-ethyl-3-methylimidazolium ethyl sulfate                                                   |
| 102 | 1,3-dimethyl imidazolium ethyl sulfate<br>(1-methyl-3-methylimidazolium ethyl sulfate)       | 1,3-dimethylimidazolium methyl sulfate(1-methyl-3-methylimidazolium methyl sulfate)         |
| 103 | 1,3-diethyl imidazolium ethyl sulfate (1-ethyl-3-ethylimidazolium ethyl sulfate)             | 1,3-diethyl imidazolium ethyl sulfate                                                       |
| 105 | 1-ethyl-2,3-dimethyl imidazolium ethyl sulfate                                               | 1-ethyl-2,3-dimethyl imidazolium ethyl sulfate                                              |
| 107 | 1-ethyl pyridinium ethyl sulfate                                                             | Pyridine; diethyl sulfate                                                                   |
| 109 | 1,2-diethylpyridinium ethyl sulfate                                                          | 2-ethyl pyridine; diethyl sulfate                                                           |
| 110 | 1-ethyl-1-methyl piperidinium ethyl sulfate                                                  | 1-methyl piperidine; dimethyl sulfate                                                       |
| 112 | 1-ethyl-3-methyl pyridinium ethyl sulfate                                                    | 3-methyl pyridine (3-Picoline); diethyl sulfate                                             |
| 113 | 1,1-dimethyl pyrrolidinium ethyl sulfate                                                     | N-ethylpyrrolidine(1-ethylpyrrolidine); dimethyl sulfate                                    |
| 114 | 1-ethyl-1-methyl pyrrolidinium ethyl sulfate                                                 | 1-methyl pyrrolidine; diethyl sulfate                                                       |
| 116 | 1-butyl-1-ethyl pyrrolidinium ethyl sulfate                                                  | 1-butyl pyrrolidine; diethyl sulfate                                                        |
| 118 | 2,2-diethyl-1,1,3,3-tetramethyl guanidinium ethyl sulfate                                    | 1,1,3,3-tetramethyl guanidine; diethyl sulfate; dichloro methane; sodium hydroxide          |
| 119 | 1-ethyl-3-methyl imidazolium methane sulfonate                                               | 1-ethyl-3-methyl imidazolium methane sulfonate                                              |
| 120 | 1,3-dimethyl imidazolium methane sulfonate (1-methyl-3-methylimidazolium methane sulfonate)  | 1,3-dimethyl imidazolium methanes ulfonate (1-methyl-3-methylimidazolium methane sulfonate) |
| 121 | 1,3-diethyl imidazolium methane sulfonate<br>(1-ethyl-3-ethyl imidazolium methane sulfonate) | formaldehyde; ethyl amine; glyoxal; methane sulfonic acid                                   |
| 122 | 1-propyl-3-methyl imidazolium methane sulfonate                                              | 1-propyl-3-methyl imidazolium chloride; methane sulfonic acid                               |
| 123 | 1-butyl-3-methyl imidazolium methane sulfonate                                               | 1-butyl-3-methyl imidazolium methane sulfonate                                              |

|     |                                                                                     |                                                                                   |
|-----|-------------------------------------------------------------------------------------|-----------------------------------------------------------------------------------|
| 124 | 1-ethyl-2,3-dimethyl imidazolium methane sulfonate                                  | 1-ethyl-2,3-dimethyl imidazolium chloride; methane sulfonic acid                  |
| 125 | 1-butyl-2,3-dimethyl imidazolium methane sulfonate                                  | 1-butyl-2,3-dimethyl imidazolium chloride; methane sulfonic acid                  |
| 126 | 1-propyl-1-methyl piperidinium methane sulfonate                                    | 1-methyl piperidine; chloropropane; methane sulfonic acid                         |
| 127 | 1-ethyl-3-methyl pyridinium methane sulfonate                                       | 1-ethyl-3-methyl pyridinium bromide; methane sulfonic acid                        |
| 128 | 1-propyl-3-methyl pyridinium methane sulfonate                                      | 1-methyl-3-propyl pyridinium bromide; methane sulfonic acid                       |
| 129 | 1-butyl-2-methyl pyridinium methane sulfonate                                       | 1-butyl-2-methyl pyridinium chloride; methane sulfonic acid                       |
| 130 | 1-butyl-3-methyl pyridinium methane sulfonate                                       | 1-butyl-3-methyl pyridinium chloride; methane sulfonic acid                       |
| 131 | 1-butyl-4-methyl pyridinium methane sulfonate                                       | 1-butyl-4-methyl pyridinium chloride; methane sulfonic acid                       |
| 132 | 1-propyl-1-methyl pyrrolidinium methane sulfonate                                   | N-methyl pyrrolidine (1-methyl pyrrolidine); chloropropane; methane sulfonic acid |
| 133 | 1-butyl-1-methyl pyrrolidinium methane sulfonate                                    | 1-butyl-1-methyl pyrrolidinium chloride; methane sulfonic acid                    |
| 134 | 1-butyl-1-ethyl pyrrolidinium methane sulfonate                                     | N-ethylpyrrolidine (1-ethyl pyrrolidine); chloropropane; methane sulfonic acid    |
| 135 | 1,1,3,3-tetramethyl guanidinium methane sulfonate                                   | 1,1,3,3-tetramethyl guanidine; methane sulfonic acid                              |
| 136 | 1-ethyl-3-methyl imidazolium ethane sulfonate                                       | 1-ethyl-3-methyl imidazolium ethane sulfonate                                     |
| 137 | 1,3-dimethyl imidazolium (1-methyl-3-methyl imidazolium) ethane sulfonate           | 1,3-dimethyl imidazolium chloride; ethane sulfonic acid                           |
| 138 | 1,3-diethyl imidazolium ethyl sulfate (1-ethyl-3-ethylimidazolium) ethane sulfonate | formaldehyde; ethyl amine; glyoxal; ethane sulfonic acid                          |
| 139 | 1-propyl-3-methylimidazolium ethane sulfonate                                       | 1-propyl-3-methyl imidazolium chloride; ethane sulfonic acid                      |
| 140 | 1-butyl-3-methyl imidazolium ethane sulfonate                                       | 1-butyl-3-methyl imidazolium chloride; ethane sulfonic acid                       |
| 141 | 1-ethyl-2,3-dimethyl imidazolium ethane sulfonate                                   | 1-ethyl-2,3-dimethylimidazolium ethane sulfonate                                  |
| 142 | 1-butyl-2,3-dimethyl imidazolium ethane sulfonate                                   | 1-butyl-2,3-dimethylimidazolium chloride; ethane sulfonic acid                    |
| 143 | 1-butyl pyridinium ethane sulfonate                                                 | 1-butyl pyridinium chloride; ethane sulfonic acid                                 |
| 144 | 1-propyl-1-methyl piperidinium ethane sulfonate                                     | 1-methyl piperidine; chloropropane; ethane sulfonic acid                          |
| 145 | 1-ethyl-3-methyl pyridinium ethane sulfonate                                        | 1-ethyl-3-methyl pyridinium bromide; ethane sulfonic acid                         |
| 146 | 1-propyl-3-methyl pyridinium ethane sulfonate                                       | 1-methyl-3-propyl pyridinium bromide; ethane sulfonic acid                        |
| 147 | 1-butyl-2-methyl pyridinium ethane sulfonate                                        | 1-butyl-2-methyl pyridinium chloride; ethane sulfonic acid                        |
| 148 | 1-butyl-3-methyl pyridinium ethane sulfonate                                        | 1-butyl-3-methyl pyridinium chloride; ethane sulfonic acid                        |
| 149 | 1-butyl-4-methyl pyridinium ethane sulfonate                                        | 1-butyl-4-methyl pyridinium chloride; ethane sulfonic acid                        |
| 150 | 1-propyl-1-methyl pyrrolidinium ethane sulfonate                                    | N-methyl pyrrolidine (1-methyl pyrrolidine); chloropropane; ethane sulfonic acid  |
| 151 | 1-butyl-1-methyl pyrrolidinium ethane sulfonate                                     | 1-butyl-1-methyl pyrrolidinium chloride; ethane sulfonic acid                     |
| 152 | 1,1,3,3-tetramethyl guanidinium ethane sulfonate                                    | 1,1,3,3-tetramethyl guanidine; ethane sulfonic acid                               |

|     |                                                     |                                                                                  |
|-----|-----------------------------------------------------|----------------------------------------------------------------------------------|
| 153 | 2-hydroxyethyl ammonium propionate                  | ethanolamine (2-aminoethanol); propionic acid                                    |
| 154 | 1-propyl-2,3-dimethyl imidazolium acetate           | 1,3-dimethylimidazolium chloride; chloropropane; acetic acid                     |
| 155 | 1-ethyl-2-butyl pyridinium acetate                  | 2-ethyl pyridine; chlorobutane; acetic acid                                      |
| 156 | 1,1-dimethyl pyrrolidinium acetate                  | N-methyl pyrrolidine (1-methyl pyrrolidine); chloromethane; acetic acid          |
| 157 | 1-butyl-1-ethyl pyrrolidinium acetate               | N-ethylpyrrolidine (1-ethyl pyrrolidine); chlorobutane; acetic acid              |
| 158 | 1-propyl-2,3-dimethyl imidazolium propionate        | 1,3-dimethyl imidazolium chloride; chloropropane; propionic acid                 |
| 159 | 1-methyl-3-propyl pyridinium propionate             | 1-methyl-3-propyl pyridinium bromide; propionic acid                             |
| 160 | 1-butyl-2-methyl pyridinium propionate              | 2-methyl pyridine; chlorobutane; propionic acid                                  |
| 161 | 1,1-dimethyl pyrrolidinium propionate               | N-methyl pyrrolidine (1-methyl pyrrolidine); chloromethane; propionic acid       |
| 162 | 1-propyl-1-methyl pyrrolidinium propionate          | N-methyl pyrrolidine (1-methyl pyrrolidine); chloropropane; propionic acid       |
| 163 | 1-butyl-1-ethyl pyrrolidinium propionate            | N-ethyl pyrrolidine (1-ethyl pyrrolidine); chlorobutane; propionic acid          |
| 164 | 1-propyl-2,3-dimethyl imidazolium butyrate          | 1,3-dimethyl imidazolium chloride; chloropropane; butyric acid                   |
| 165 | 1-methyl-3-propyl pyridinium butyrate               | 1-methyl-3-propyl pyridinium bromide; butyric acid                               |
| 166 | 1-butyl-2-methyl pyridinium butyrate                | 2-methylpyridine; chlorobutane; butyric acid                                     |
| 167 | 1-ethyl-2-butyl pyridinium butyrate                 | 2-ethyl pyridine; chlorobutane; butyric acid                                     |
| 168 | 1,1-dimethyl pyrrolidinium butyrate                 | N-methyl pyrrolidine (1-methyl pyrrolidine); chloromethane; butyric acid         |
| 169 | 1-butyl-1-ethyl pyrrolidinium butyrate              | N-ethylpyrrolidine(1-ethylpyrrolidine); chlorobutane; butyric acid               |
| 170 | 1-methyl-3-propyl imidazolium bisulfate             | 1-propyl-3-methyl imidazolium chloride; sodium bisulfate                         |
| 171 | 1-propyl-2,3-dimethyl imidazolium bisulfate         | 1,3-dimethyl imidazolium chloride; chloropropane; sodium bisulfate               |
| 172 | 1-methyl-3-propyl pyridinium bisulfate              | 1-methyl-3-propyl pyridinium bromide; sodium bisulfate                           |
| 173 | 1-butyl-2-methyl pyridinium bisulfate               | 2-methylpyridine; chlorobutane; sodium bisulfate                                 |
| 174 | 1-ethyl-2-butyl pyridinium bisulfate                | 2-ethyl pyridine; chlorobutane; sodium bisulfate                                 |
| 175 | 1,1-dimethyl pyrrolidinium bisulfate                | N-methyl pyrrolidine (1-methyl pyrrolidine); chloromethane; sulfuric acid        |
| 176 | 1-propyl-1-methyl pyrrolidinium bisulfate           | N-methyl pyrrolidine (1-methyl pyrrolidine); chloropropane; sulfuric acid        |
| 177 | 1-propyl-2,3-dimethyl imidazolium methyl sulfate    | 1-propyl-3-methyl imidazolium chloride; dimethyl sulfate                         |
| 178 | 1-propyl-2,3-dimethyl imidazolium ethyl sulfate     | 1-propyl-3-methyl imidazolium chloride; diethyl sulfate                          |
| 183 | 1-propyl-2,3-dimethyl imidazolium methane sulfonate | 1,3-dimethyl imidazolium chloride; chloropropane; methane sulfonic acid          |
| 184 | 1-ethylpyridinium methane sulfonate                 | 1-ethyl pyridinium chloride; methane sulfonic acid                               |
| 185 | 1-methyl-3-propyl pyridinium methane sulfonate      | 1-methyl-3-propyl pyridinium bromide; methane sulfonic acid                      |
| 186 | 1-ethyl-2-butyl pyridinium methane sulfonate        | 2-ethyl pyridine; chlorobutane; ethane sulfonic acid                             |
| 187 | 1,1-dimethyl pyrrolidinium methane sulfonate        | N-methyl pyrrolidine (1-methylpyrrolidine); chloromethane; methane sulfonic acid |
| 188 | 1-propyl-2,3-dimethyl imidazolium ethane sulfonate  | 1,3-dimethyl imidazolium chloride; chloro propane; ethane sulfonic acid          |

|     |                                                 |                                                                              |
|-----|-------------------------------------------------|------------------------------------------------------------------------------|
| 189 | 1-ethyl pyridinium ethane sulfonate             | 1-ethyl pyridinium chloride; ethane sulfonic acid                            |
| 190 | 1-methyl-3-propyl pyridinium ethane sulfonate   | 1-methyl-3-propyl pyridinium bromide; ethane sulfonic acid                   |
| 191 | 1-ethyl-2-butyl pyridinium ethane sulfonate     | 2-ethyl pyridine; chlorobutane; ethane sulfonic acid                         |
| 192 | 1-butyl-1-ethyl pyrrolidinium ethane sulfonate  | N-ethylpyrrolidine(1-ethylpyrrolidine); chlorobutane; ethane sulfonic acid   |
| 193 | 1-butyl-1-ethyl pyrrolidinium methane sulfonate | N-ethyl pyrrolidine(1-ethylpyrrolidine); chlorobutane; methane sulfonic acid |

The criteria and the relevant source of information that was chosen for the study are shown in Table S2. To collect the information on criteria such as signal wording, hazard statements, precautionary statements, carcinogenicity, special hazards arising from the substance or mixture/hazardous decomposition products, safety data sheets (SDS) were referred from the following list of companies to collect the information

- Sigma Aldrich
- Acros Organics
- Alfa Aesar
- BASF
- Carl Roth
- ChemSrc
- Merck
- Santa Cruz Biotechnology Inc.
- Sisco Research Laboratories Pvt. Ltd. (SRL)
- Solvionic
- Tokyo Chemical Industry (TCI) Chemicals
- Thermo Fisher Scientific
- Proionic
- Iolitec

Values for Octanol-water coefficient and biodegradation parameters as well as Toxicity towards different organisms: *Daphnia Magna*, *algae*, *fish*, *rodents ingestion (oral route)* are taken from SDS collected from the list of companies mentioned above, scientific papers and additionally from European Chemical Agency (ECHA) database register[24], PubChem[25], Chemspider[26]. For The Technique for Order of Preferentiality by Similarity to Ideal Solution (TOPSIS) analysis, numerical values are required. Therefore the collected information have been transformed, into numerical values adopting the procedure reported by Marta et al.[27,28]. Since the data availability for designed and other commercial HF-ILs from company databases like Sigma-Aldrich, Solvionic, Iolitec, are limited, most information for analysis in our work are collected through the Safety Data Sheets (SDS) available from those companies as mentioned above.

**Table S2.** Criteria, parameters describing the ionic liquids along with their weighting factors

| Criterion      | Description                                                   | Source                                                         | Weightage |
|----------------|---------------------------------------------------------------|----------------------------------------------------------------|-----------|
| H-statements   | Hazard statements are transformed numerically into points     | Safety data sheets, papers, ECHA database, Pubchem, Chemspider | 0.06      |
| P-statements   | Precaution statements are transformed numerically into points | Safety data sheets, papers, ECHA database, Pubchem, Chemspider | 0.06      |
| Signal wording | Descriptions are transformed numerically into points          | Safety data sheets,                                            | 0.02      |

|                                     |                                                                                                                               |                                                                |      |
|-------------------------------------|-------------------------------------------------------------------------------------------------------------------------------|----------------------------------------------------------------|------|
|                                     |                                                                                                                               | papers, ECHA database, Pubchem, Chemspider                     |      |
| Hazardous decomposition products    | Descriptions related to the combustion of hazardous products are transformed numerically into points                          | Safety data sheets, papers, ECHA database, Pubchem, Chemspider | 0.02 |
| Biodegradability                    | 28 days degradation test expressed in %                                                                                       | Safety data sheets, papers, ECHA database, Pubchem, Chemspider | 0.1  |
| Toxicity Daphnia magna              | 48 h/24 h test data was collected based on the availability                                                                   | Safety data sheets, papers, ECHA database, Pubchem, Chemspider | 0.13 |
| Toxicity algae                      | 96 h/72 h test data was collected based on the availability                                                                   | Safety data sheets, papers, ECHA database, Pubchem, Chemspider | 0.13 |
| Toxicity fish                       | 96 h/48 h test data was collected based on the availability                                                                   | Safety data sheets, papers, ECHA database, Pubchem, Chemspider | 0.13 |
| Toxicity rodents via ingestion      | Test data rodents (rats or other similar preferable organism) body mass                                                       | Safety data sheets, papers, ECHA database, Pubchem, Chemspider | 0.13 |
| Flash point                         | Expressed in K                                                                                                                | Safety data sheets, papers, ECHA database, Pubchem, Chemspider | 0.04 |
| Partition coefficient, Log $P_{ow}$ | Dimensionless                                                                                                                 | Safety data sheets, papers, ECHA database, Pubchem, Chemspider | 0.04 |
| Vapor pressure                      | Expressed in hPa at 25 °C                                                                                                     | Safety data sheets, papers, ECHA database, Pubchem, Chemspider | 0.06 |
| pH                                  | Dimensionless                                                                                                                 | Safety data sheets, , ECHA database, Pubchem, Chemspider       | 0.04 |
| Carcinogenity                       | Human carcinogenicity classification based on IARC are translated into numbers – group 1 (5), group 2A (4) and group 2B (3.5) | Safety data sheets, papers, ECHA database, Pubchem, Chemspider | 0.04 |

### 1.2. Multi-criteria decision analysis (MCDA)-TOPSIS

Multicriteria decision analysis (MCDA) is a collection of methodologies aimed at identifying the most favourable alternative while ranking all the remaining ones [29,30]. MCDA helps to integrate the results of multiple evaluation criteria into a single, easily interpreted number - one for each alternative. It's especially useful when the assessment criteria are at odds with one another. To put it in another way, MCDA allows one to prioritise all the alternatives (such as ILs) based on the ranking through TOPSIS methodology. Hwang and Yoon [31] developed TOPSIS algorithm which helps to identify the best alternative by transforming all the criteria into a numerical matrix, calculate the shortest



and longest distance from the ideal and non-ideal solution. The key advantage with TOPSIS method is that, it allows to rank all the alternatives by combining different criteria and obtaining a single value, which is based on the similarity to the ideal solution ranging from 0 to 1. “0” infers to a completely non-ideal (or negative ideal) option, indicating that it is characterised by the worst values for each and every criterion, farthest distance from the completely ideal (or positive ideal) solution. On the contrary, “1” indicates that an ideal solution has been identified, indicating that the best values have been obtained for all the criteria and, has attained the shortest distance from the completely ideal solution. In order to apply this methodology, the criteria that has been selected to evaluate the greenness of ILs has to be transformed into numerical values. Prior to the analysis, the information collected on different criteria from sources (as mentioned above) for different raw materials was transformed into numerical values by adopting the methodology proposed by Marta et al.[27,28]. The numerical values are represented as a  $n \times m$  matrix consisting of  $n$  raw materials (=74) against  $m$  criteria (=14).

One of the primary benefits with TOPSIS is that its capability to combine numerous different criteria into a single score and obtain full ranking, and assigning the ranking based on the value of similarity to ideal solution. In this way, the collected information that is transformed into numerical, is converted into a single score for each alternative through TOPSIS. The ordering of the alternatives is ranked based on the alternative's calculated distance to the completely ideal solution (value of similarity to the ideal solution).

#### 1.2.1. TOPSIS Algorithm

The input data for TOPSIS analysis is the matrix consisting of  $n$ (=74) raw materials as rows and  $m$ (=14) criteria as columns, which are transformed into numerical data points. The algorithm is represented in 6 steps as follows:

1. Construction of normalised decision matrix

$$r_{ij} = x_{ij} \div \sqrt{\sum x_{ij}^2}, \quad i = 1, 2, \dots, m \text{ and } j = 1, 2, \dots, n \quad (1)$$

- Where  $x_{ij}$  and  $r_{ij}$  are original and normalised scores in decision matrix, respectively (subscripts  $i$ ,  $j$  represents the row index and column index of the respective numerical data point)

2. Construction of the weighted normalised decision matrix

$$v_{ij} = r_{ij} \times w_j, \quad i = 1, 2, \dots, m \text{ and } j = 1, 2, \dots, n \quad (2)$$

Where  $w_j$  is the weight of the criterion and  $\sum_{j=1}^n w_j = 1$

3. Determination of positive ideal ( $A^+$ ) and negative ideal ( $A^-$ ) solutions

$$A^+ = \{(max_i v_{ij} | j \in C_b), (min_i v_{ij} | j \in C_c)\} = \{v_i^* | j = 1, 2, \dots, m\} \quad (3)$$

$$A^- = \{(min_i v_{ij} | j \in C_b), (max_i v_{ij} | j \in C_c)\} = \{v_j^- | j = 1, 2, \dots, m\} \quad (4)$$

4. Calculation of the separation measures for each alternative

$$S_i^+ = \sqrt{\sum_{j=1}^m (v_{ij} - v_j^*)^2} \quad j = 1, 2, \dots, m \quad (5)$$

$$S_i^- = \sqrt{\sum_{j=1}^m (v_{ij} - v_j^-)^2} \quad j = 1, 2, \dots, m \quad (6)$$

## 5. Calculation of the relative closeness to the ideal solution

$$C_i^* = \frac{S_i^-}{S_i^+ + S_i^-}, \quad i = 1, 2, \dots, m \quad \text{and} \quad 0 < C_i^* < 1 \quad (7)$$

## 6. Arrangement of scenarios in order of closest to ideal ("1") to farthest from ideal ("0")—creation of a ranking

The alternative with  $C_i^*$  closest to 1 is the best preference among the possible options.

TOPSIS algorithm presented above is the simplest possible representation and detailed information explaining the fundamentals can be found elsewhere [31–33]. Calculations performed stepwise as per TOPSIS algorithm were carried out using Microsoft Excel program (MS-Excel 2016) adopting the methodology developed by Hwang et al. [31]. Prior to estimation of the quantifiable responses for the HF-ILs, the relativeness closeness to the ideal solutions for the raw materials was evaluated followed by sensitivity analysis at  $\pm 10\%$ . The results are shown in Table S3. Based on the data set of raw materials, it is observed that toxicity, hazard and precautionary statements are observed as the major influencing factors. Therefore, these values were changed randomly and the newly calculated relativeness closeness to ideal solutions (representing the sensitivity changes) along with their relative ranking differences are shown in Table S3. As can be seen from the table, it is evident that there are no significant differences in the overall ranking indicating that the ranking results are safely reliable and considered to be accurate. The HF-ILs mixture that could be synthesized from these basic ingredients (as mentioned in Table S1) are expected to function similarly, guided by the same mechanism/mode of action, and differ solely in potencies, according to general principles of mixture toxicology [34].

Considering such scenario, effects can be calculated simply from the sum of doses/concentrations, adjusted for relative toxicity (dose/concentration addition) for mixtures of similar acting substances (such as HF-ILs).

$$E(C_{mix}) = \sum_{i=1}^n aE(C_i) \quad (8)$$

where  $E(C_{mix})$  is combined effect at the equimolar mixture concentration of raw materials ( $C_{mix}$ ), and  $E(C_i)$  is the similarity to ideal solution (calculated for different raw materials with TOPSIS) of individual mixture component ( $i$ ) applied at the concentration ( $C_i$ ). In principle, doses or concentrations of the single components are added after being multiplied by a scaling factor " $a$ " that accounts for differences in the potency of the individual substances. In our analysis, we have assumed  $a=1$  considering an equimolar ratios of the raw materials for the preparation of HF-ILs.

Values of similarity to the ideal solution obtained by evaluating the combined greenness effect from equation (8) are represented as  $E(C_{mix})$  in Table S4.

**Table S3.** Table showing the results of TOPSIS analysis for raw materials. For the sake of brevity, the relative closeness to the ideal solution, ranking, ranking difference for  $\pm 10\%$  sensitivity changes are represented separately.

| S.No | Raw Materials                | $C_i^*$ | Ranking | $C_{i^*, \pm 10\%}$ | Ranking | Rank Difference<br>( $C_{i^*, \pm 10\%}, C_i^*$ ) |
|------|------------------------------|---------|---------|---------------------|---------|---------------------------------------------------|
| 1    | 1,1,3,3-tetramethylguanidine | 0.62834 | 1       | 0.62574             | 1       | 0                                                 |
| 2    | 1-butyl imidazole            | 0.20584 | 2       | 0.20861             | 2       | 0                                                 |

|    |                                          |         |    |         |    |    |
|----|------------------------------------------|---------|----|---------|----|----|
| 3  | 1-butyl-2,3-dimethylimidazolium chloride | 0.20399 | 3  | 0.20180 | 3  | 0  |
| 4  | 1-butyl-3-methylimidazolium bromide      | 0.17182 | 4  | 0.16376 | 5  | 1  |
| 5  | 1-butyl-3-methylimidazolium chloride     | 0.17165 | 5  | 0.17403 | 4  | -1 |
| 6  | 1-butyl-3-methylpyridinium chloride      | 0.15802 | 6  | 0.15974 | 6  | 0  |
| 7  | 1-butylpyrrolidine                       | 0.15299 | 7  | 0.15313 | 7  | 0  |
| 8  | 1-chloropropane                          | 0.13865 | 8  | 0.13859 | 8  | 0  |
| 9  | 1-ethyl imidazole                        | 0.13534 | 9  | 0.13224 | 9  | 0  |
| 10 | 1-ethyl pyridinium chloride              | 0.13088 | 10 | 0.13083 | 10 | 0  |
| 11 | 1-ethyl-3-methylimidazolium bromide      | 0.12122 | 11 | 0.12090 | 11 | 0  |
| 12 | 1-ethyl-3-methylimidazolium chloride     | 0.12095 | 12 | 0.12084 | 12 | 0  |
| 13 | 1-ethyl-3-methyl pyridinium bromide      | 0.11732 | 13 | 0.11736 | 13 | 0  |
| 14 | 1-methyl imidazole                       | 0.11682 | 14 | 0.11633 | 14 | 0  |
| 15 | 1-methyl piperidine                      | 0.11622 | 15 | 0.11037 | 23 | 8  |
| 16 | 1-Methyl pyrrolidine                     | 0.11619 | 16 | 0.11616 | 15 | -1 |
| 17 | 1-Propyl imidazole                       | 0.11539 | 17 | 0.11528 | 16 | -1 |
| 18 | 1-propyl-3-methylimidazolium chloride    | 0.11466 | 18 | 0.11431 | 18 | 0  |
| 19 | 1-propyl pyrrolidine                     | 0.11425 | 19 | 0.11410 | 19 | 0  |
| 20 | 2-ethyl pyridine                         | 0.11393 | 20 | 0.11490 | 17 | -3 |
| 21 | 2-methyl imidazole                       | 0.11343 | 21 | 0.11273 | 21 | 0  |
| 22 | 3-butyl pyridine                         | 0.11330 | 22 | 0.11393 | 20 | -2 |
| 23 | 3-methyl pyridine (3-Picoline)           | 0.11319 | 23 | 0.10922 | 26 | 3  |
| 24 | Acetic Acid                              | 0.11191 | 24 | 0.11166 | 22 | -2 |
| 25 | Acetonitrile                             | 0.10998 | 25 | 0.11002 | 24 | -1 |
| 26 | Butyric acid                             | 0.10982 | 26 | 0.10934 | 25 | -1 |
| 27 | chlorobutane                             | 0.10899 | 27 | 0.10895 | 27 | 0  |
| 28 | chloroethane                             | 0.10828 | 28 | 0.10772 | 29 | 1  |
| 29 | chloromethane                            | 0.10826 | 29 | 0.10815 | 28 | -1 |
| 30 | cholinium hydroxide                      | 0.10773 | 30 | 0.10764 | 30 | 0  |
| 31 | dichloro methane                         | 0.10728 | 31 | 0.10727 | 32 | 1  |
| 32 | Diethyl sulfate                          | 0.10711 | 32 | 0.10634 | 33 | 1  |
| 33 | Dimethyl sulfate                         | 0.10636 | 33 | 0.10619 | 34 | 1  |
| 34 | Ethane sulfonic acid                     | 0.10621 | 34 | 0.10734 | 31 | -3 |
| 35 | Ethanol                                  | 0.10621 | 35 | 0.10595 | 36 | 1  |
| 36 | Ethanolamine (2-aminoethanol)            | 0.10609 | 36 | 0.10602 | 35 | -1 |
| 37 | Ethyl acetate                            | 0.10516 | 37 | 0.10463 | 38 | 1  |
| 38 | Ethyl amine                              | 0.10492 | 38 | 0.10465 | 37 | -1 |
| 39 | Formaldehyde                             | 0.10270 | 39 | 0.10303 | 39 | 0  |
| 40 | Glyoxal                                  | 0.10246 | 40 | 0.10257 | 40 | 0  |
| 41 | Imidazole                                | 0.09777 | 41 | 0.09765 | 42 | 1  |

|    |                                                  |         |    |               |    |    |
|----|--------------------------------------------------|---------|----|---------------|----|----|
| 42 | Methane sulfonic acid                            | 0.09746 | 42 | 0.09771       | 41 | -1 |
| 43 | Methanol                                         | 0.09710 | 43 | 0.09699       | 43 | 0  |
| 44 | Methyl amine                                     | 0.09512 | 44 | 0.09438       | 45 | 1  |
| 45 | Methyl Propionate                                | 0.09453 | 45 | 0.09442       | 44 | -1 |
| 46 | N-butyl amine (1- Amino butane,<br>n-Butylamine) | 0.09334 | 46 | 0.09316       | 48 | 2  |
| 47 | N-ethylpyrrolidine(1-ethylpyr-<br>rolidine)      | 0.09333 | 47 | 0.09321       | 47 | 0  |
| 48 | 1-methylpiperidine                               | 0.09324 | 48 | 0.09356       | 46 | -2 |
| 49 | N-methylpyrrolidine (1-<br>methylpyrrolidine)    | 0.09241 | 49 | 0.09266       | 49 | 0  |
| 50 | Propionic acid                                   | 0.09110 | 50 | 0.09098       | 50 | 0  |
| 51 | Propyl amine (1-Aminopropane)                    | 0.09028 | 51 | 0.09017       | 51 | 0  |
| 52 | Pyridine                                         | 0.09026 | 52 | 0.09015       | 52 | 0  |
| 53 | Silver acetate                                   | 0.09025 | 53 | 0.09014       | 53 | 0  |
| 54 | Sodium acetate                                   | 0.08993 | 54 | 0.08985       | 54 | 0  |
| 55 | Sodium bisulfate                                 | 0.08906 | 55 | 0.08897       | 55 | 0  |
| 56 | Sodium ethoxide (Sodium ethyl-<br>ate)           | 0.08861 | 56 | 0.08851       | 56 | 0  |
| 57 | Sodium Hydroxide                                 | 0.08738 | 57 | 0.08738       | 57 | 0  |
| 58 | Sulfuric acid                                    | 0.08644 | 58 | 0.08631       | 58 | 0  |
| 59 | Toluene                                          | 0.08251 | 59 | 0.08274       | 59 | 0  |
| 60 | 1-butyl pyridinium chloride                      | 0.08245 | 60 | 0.08195       | 62 | 2  |
| 61 | 1-ethyl-2,3-dimethylimidazolium<br>chloride      | 0.08208 | 61 | 0.08200       | 61 | 0  |
| 62 | 1-methyl-3-propylpyridinium<br>bromide           | 0.08206 | 62 | 0.08250       | 60 | -2 |
| 63 | Sodium butyrate                                  | 0.08120 | 63 | 0.07817       | 64 | 1  |
| 64 | 1-butyl-2-methylpyridinium<br>chloride           | 0.08087 | 64 | 0.08099       | 63 | -1 |
| 65 | 1-butyl-1-methylpyrrolidinium<br>chloride        | 0.07818 | 65 | 0.07683       | 65 | 0  |
| 66 | 1-Butyl-4-methylpyridinium<br>chloride           | 0.07508 | 66 | 0.07496       | 66 | 0  |
| 67 | 1,3-dimethylimidazolium chlo-<br>ride            | 0.07480 | 67 | 0.074714<br>2 | 67 | 0  |
| 68 | 1,2-dimethylimidazole                            | 0.07193 | 68 | 0.07203       | 68 | 0  |
| 69 | Butanol                                          | 0.06912 | 69 | 0.06907       | 69 | 0  |
| 70 | Bromoethane                                      | 0.06276 | 70 | 0.06264       | 70 | 0  |
| 71 | 4-methyl pyridine (4-Picole)                     | 0.06208 | 71 | 0.06201       | 71 | 0  |
| 72 | 2-methylpyridine                                 | 0.05897 | 72 | 0.05919       | 72 | 0  |
| 73 | 1-Propanol                                       | 0.05019 | 73 | 0.05011       | 73 | 0  |
| 74 | Pyrrolidine                                      | 0.04802 | 74 | 0.04802       | 74 | 0  |

**Table S4.** Overall ranking of the halide free ILs

| Ranking | Name of the Ionic Liquid                                  | Abbreviation                                            | Similarity to the ideal solution value, $E(C_{mix})$ |
|---------|-----------------------------------------------------------|---------------------------------------------------------|------------------------------------------------------|
| 1       | methanol                                                  | [MeOH]                                                  | 0.62834                                              |
| 2       | 1,3-diethyl imidazolium acetate                           | [EE'Im][OAc]                                            | 0.46447                                              |
| 3       | 1-ethyl-2-butyl pyridinium bisulfate                      | [E2BPyr][HSO <sub>4</sub> ]                             | 0.46441                                              |
| 4       | 1,3-diethyl imidazolium propionate                        | [EE'Im][C <sub>2</sub> COO]                             | 0.46025                                              |
| 5       | 1-propyl-1-methyl piperidinium bisulfate                  | [PMPip][HSO <sub>4</sub> ]                              | 0.45638                                              |
| 6       | 1,3-diethyl imidazolium butyrate                          | [EE'Im][C <sub>3</sub> COO]                             | 0.45439                                              |
| 7       | 1,3-dimethyl imidazolium bisulfate                        | [MM'Im][HSO <sub>4</sub> ]                              | 0.44969                                              |
| 8       | 1-propyl-2,3-dimethyl imidazolium bisulfate               | [PMM'Im][HSO <sub>4</sub> ]                             | 0.44879                                              |
| 9       | 1,3-diethyl imidazolium bisulfate                         | [EE'Im][HSO <sub>4</sub> ]                              | 0.42599                                              |
| 10      | 2,2-diethyl-1,1,3,3-tetramethyl guanidinium ethyl sulfate | [EE'TMG][EtSO <sub>4</sub> ]                            | 0.41882                                              |
| 11      | 1,3-diethyl imidazolium methane sulfonate                 | [EE'Im][CH <sub>3</sub> SO <sub>3</sub> ]               | 0.41720                                              |
| 12      | 1,3-diethyl imidazolium ethane sulfonate                  | [EE'Im][C <sub>2</sub> H <sub>5</sub> SO <sub>3</sub> ] | 0.41503                                              |
| 13      | 1-butyl-1-ethyl pyrrolidinium acetate                     | [BEPyr][OAc]                                            | 0.41328                                              |
| 14      | 1-butyl-1-ethyl pyrrolidinium propionate                  | [BEPyr][C <sub>2</sub> COO]                             | 0.40906                                              |
| 15      | 1-butyl-1-ethyl pyrrolidinium methane sulfonate           | [BEPyr][CH <sub>3</sub> SO <sub>3</sub> ]               | 0.40903                                              |
| 16      | 1-ethyl-2,3-dimethyl imidazolium bisulfate                | [EMM'Im][HSO <sub>4</sub> ]                             | 0.40766                                              |
| 17      | 1-butyl-1-ethyl pyrrolidinium butyrate                    | [BEPyr][C <sub>3</sub> COO]                             | 0.40320                                              |
| 18      | 1-butyl-2,3-dimethyl imidazolium bisulfate                | [BMM'Im][HSO <sub>4</sub> ]                             | 0.40032                                              |
| 19      | 1-butyl-2,3-dimethyl imidazolium methyl sulfate           | [BMM'Im][MeSO <sub>4</sub> ]                            | 0.39949                                              |
| 20      | 1-ethyl-2,3-dimethyl imidazolium methyl sulfate           | [EMM'Im][MeSO <sub>4</sub> ]                            | 0.38581                                              |
| 21      | 1-butyl-2-methyl pyridinium bisulfate                     | [B2MPyr][HSO <sub>4</sub> ]                             | 0.38369                                              |
| 22      | 1-ethyl-2-butyl pyridinium acetate                        | [E2BPyr][OAc]                                           | 0.37927                                              |
| 23      | 1-propyl-1-methyl piperidinium acetate                    | [PMPip][OAc]                                            | 0.37015                                              |
| 24      | 1-ethyl-2-butyl pyridinium butyrate                       | [E2BPyr][C <sub>3</sub> COO]                            | 0.36918                                              |
| 25      | 1-propyl-1-methyl piperidinium propionate                 | [PMPip][C <sub>2</sub> COO]                             | 0.36701                                              |
| 26      | 1-butyl-1-ethyl pyrrolidinium methane sulfonate           | [BEPyr][CH <sub>3</sub> SO <sub>3</sub> ]               | 0.36601                                              |
| 27      | 1-butyl-1-ethyl pyrrolidinium ethane sulfonate            | [BEPyr][C <sub>2</sub> H <sub>5</sub> SO <sub>3</sub> ] | 0.36384                                              |
| 28      | 1-propyl-2,3-dimethyl imidazolium acetate                 | [PMM'Im][OAc]                                           | 0.36364                                              |
| 29      | 1-propyl-1-methyl piperidinium butyrate                   | [PMPip][C <sub>3</sub> COO]                             | 0.36007                                              |
| 30      | 1-propyl-2,3-dimethyl imidazolium propionate              | [PMM'Im][C <sub>2</sub> COO]                            | 0.35942                                              |
| 31      | Choline acetate                                           | [Ch][OAc]                                               | 0.35756                                              |
| 32      | ethanol                                                   | [EtOH]                                                  | 0.35613                                              |
| 33      | 1-propyl-3-methyl imidazolium propionate                  | [PMIm][C <sub>2</sub> COO]                              | 0.35396                                              |
| 34      | 1-propyl-2,3-dimethyl imidazolium butyrate                | [PMM'Im][C <sub>3</sub> COO]                            | 0.35356                                              |
| 35      | Choline propionate                                        | [Ch][C <sub>2</sub> COO]                                | 0.35333                                              |
| 36      | 1,1-dimethyl pyrrolidinium acetate                        | [MM'Pyr][OAc]                                           | 0.35101                                              |
| 37      | Choline butyrate                                          | [Ch][C <sub>3</sub> COO]                                | 0.34748                                              |
| 38      | 1,1-dimethyl pyrrolidinium propionate                     | [MM'Pyr][C <sub>2</sub> COO]                            | 0.34679                                              |
| 39      | 1-propyl-3-methyl pyridinium acetate                      | [PMPyr][OAc]                                            | 0.34379                                              |
| 39      | 1-propyl-3-methyl pyridinium butyrate                     | [P3MPyr][C <sub>3</sub> COO]                            | 0.34379                                              |

|    |                                                     |                                                          |         |
|----|-----------------------------------------------------|----------------------------------------------------------|---------|
| 41 | 1,1-dimethyl pyrrolidinium butyrate                 | [MM'Pyr][C <sub>3</sub> COO]                             | 0.34093 |
| 42 | 1-propyl-3-methyl pyridinium propionate             | [PMPyr][C <sub>2</sub> COO]                              | 0.33957 |
| 43 | 1-propyl-1-methyl pyrrolidinium propionate          | [PMPyr][C <sub>2</sub> COO]                              | 0.33648 |
| 44 | 1-ethyl-2-butyl pyridinium methane sulfonate        | [E2BPyr][CH <sub>3</sub> SO <sub>3</sub> ]               | 0.32982 |
| 44 | 1-ethyl-2-butyl pyridinium ethane sulfonate         | [E2BPyr][C <sub>2</sub> H <sub>5</sub> SO <sub>3</sub> ] | 0.32982 |
| 46 | 1-propyl-3-methyl pyridinium methyl sulfate         | [PMPyr][MeSO <sub>4</sub> ]                              | 0.32609 |
| 47 | 1,3-dibutyl imidazolium propionate                  | [BB'Im][C <sub>2</sub> COO]                              | 0.32516 |
| 48 | 1-propyl-1-methyl piperidinium methane sulfonate    | [PMPip][CH <sub>3</sub> SO <sub>3</sub> ]                | 0.32396 |
| 49 | 1-ethyl-2,3-dimethyl imidazolium acetate            | [EMM'Im][OAc]                                            | 0.32251 |
| 50 | 1-propyl-1-methyl piperidinium ethane sulfonate     | [PMPip][C <sub>2</sub> H <sub>5</sub> SO <sub>3</sub> ]  | 0.32179 |
| 51 | 1-ethyl-1-methyl pyrrolidinium methyl sulfate       | [EMPyr][MeSO <sub>4</sub> ]                              | 0.32009 |
| 51 | 1,1-dimethyl pyrrolidinium ethyl sulfate            | [MM'Pyr][EtSO <sub>4</sub> ]                             | 0.32009 |
| 53 | 1-ethyl-2,3-dimethyl imidazolium propionate         | [EMM'Im][C <sub>2</sub> COO]                             | 0.31828 |
| 54 | 1-butyl-1-methyl pyrrolidinium bisulfate            | [BMPyr][HSO <sub>4</sub> ]                               | 0.31795 |
| 55 | 1-propyl-2,3-dimethyl imidazolium methane sulfonate | [PMM'Im][CH <sub>3</sub> SO <sub>3</sub> ]               | 0.31637 |
| 56 | 1-butyl-2,3-dimethyl imidazolium acetate            | [BEMM'Im][OAc]                                           | 0.31517 |
| 57 | 1-propyl-2,3-dimethyl imidazolium ethane sulfonate  | [PMM'Im][C <sub>2</sub> H <sub>5</sub> SO <sub>3</sub> ] | 0.31420 |
| 58 | 1,1-dimethyl pyrrolidinium bisulfate                | [MM'Pyr][HSO <sub>4</sub> ]                              | 0.31253 |
| 59 | 1-ethyl-2,3-dimethylimidazolium butyrate            | [EMM'Im][C <sub>3</sub> COO]                             | 0.31243 |
| 60 | 1-butyl-1-methyl piperidinium acetate               | [BMPip][OAc]                                             | 0.31173 |
| 61 | 1-butyl-3-methyl imidazolium propionate             | [BMIm][C <sub>2</sub> COO]                               | 0.31094 |
| 61 | 1-butyl-2,3-dimethyl imidazolium propionate         | [BMM'Im][C <sub>2</sub> COO]                             | 0.31094 |
| 63 | 1-butyl-2,3-dimethyl imidazolium butyrate           | [BMM'Im][C <sub>3</sub> COO]                             | 0.30509 |
| 64 | 1-butyl-3-methyl pyridinium bisulfate               | [BMPyr][HSO <sub>4</sub> ]                               | 0.30383 |
| 65 | 1,1-dimethyl pyrrolidinium methane sulfonate        | [MM'Pyr][CH <sub>3</sub> SO <sub>3</sub> ]               | 0.30374 |
| 66 | 1-propyl-1-methyl pyrrolidinium bisulfate           | [PMPyr][HSO <sub>4</sub> ]                               | 0.30222 |
| 67 | 1-propyl-1-methyl pyrrolidinium methyl sulfate      | [PMPyr][MeSO <sub>4</sub> ]                              | 0.30202 |
| 68 | 1-propyl-3-methyl imidazolium bisulfate             | [PMIm][HSO <sub>4</sub> ]                                | 0.30049 |
| 68 | 1-methyl-3-propyl imidazolium bisulfate             | [BPIm][HSO <sub>4</sub> ]                                | 0.30049 |
| 70 | 1-butyl-4-methyl pyridinium bisulfate               | [B4MPyr][HSO <sub>4</sub> ]                              | 0.29943 |
| 71 | 1-butyl-3-methyl pyridinium acetate                 | [B3MPyr][OAc]                                            | 0.29772 |
| 72 | 1-butyl-1-methyl pyrrolidinium acetate              | [BMPyr][OAc]                                             | 0.29769 |
| 73 | 1-butyl-3-methyl pyridinium propionate              | [B3MPyr][C <sub>2</sub> COO]                             | 0.29655 |
| 74 | 1-propyl-3-methyl pyridinium bisulfate              | [PMPyr][HSO <sub>4</sub> ]                               | 0.29604 |
| 74 | 1-methyl-3-propyl pyridinium bisulfate              | [MPPyr][HSO <sub>4</sub> ]                               | 0.29604 |
| 76 | 1-butyl-2-methyl pyridinium propionate              | [B2MPyr][C <sub>2</sub> COO]                             | 0.29432 |
| 77 | 1-propyl-1-methyl pyrrolidinium methane sulfonate   | [P<Pyr][CH <sub>3</sub> SO <sub>3</sub> ]                | 0.29344 |
| 78 | 1-propyl-1-methyl pyrrolidinium ethane sulfonate    | [PMPyr][C <sub>2</sub> H <sub>5</sub> SO <sub>3</sub> ]  | 0.29126 |
| 79 | 1-butyl imidazolium acetate                         | [BIm][OAc]                                               | 0.28952 |
| 80 | 1-butyl-2-methyl pyridinium butyrate                | [B <sub>2</sub> MPyr][C <sub>3</sub> COO]                | 0.28846 |

|     |                                                  |                               |         |
|-----|--------------------------------------------------|-------------------------------|---------|
| 81  | 1,2-diethyl pyridinium ethyl sulfate             | [EE'Pyr][EtSO <sub>4</sub> ]  | 0.28722 |
| 82  | 2-ethyl-1-methyl pyridinium methyl sulfate       | [E'M'Pyr][MeSO <sub>4</sub> ] | 0.28607 |
| 83  | 1-propyl-3-methyl imidazolium methyl sulfate     | [PMIm][MeSO <sub>4</sub> ]    | 0.28590 |
| 84  | 1-ethyl pyridinium bisulfate                     | [Epyr][HSO <sub>4</sub> ]     | 0.27773 |
| 85  | 1-ethyl-3-methyl pyridinium bisulfate            | [EMPyr][HSO <sub>4</sub> ]    | 0.27594 |
| 86  | 1-butyl pyridinium bisulfate                     | [BPyr][HSO <sub>4</sub> ]     | 0.27502 |
| 87  | 1-propyl imidazolium acetate                     | [PIIm][OAc]                   | 0.26912 |
| 88  | Methyl propionate                                | [MeC <sub>2</sub> COO]        | 0.25653 |
| 89  | 1-butyl-1-ethyl pyrrolidinium ethyl sulfate      | [BEPyr][EtSO <sub>4</sub> ]   | 0.24016 |
| 90  | 1-butyl-1-methyl pyrrolidinium methyl sulfate    | [BMPyr][MeSO <sub>4</sub> ]   | 0.23901 |
| 91  | 1-butyl-3-methyl imidazolium methyl sulfate      | [BMIm][MeSO <sub>4</sub> ]    | 0.23619 |
| 92  | 1,1-Dimethyl piperidinium methyl sulfate         | [MM'Pip][MeSO <sub>4</sub> ]  | 0.23503 |
| 92  | 1-ethyl-1-methyl piperidinium ethyl sulfate      | [EMPip][EtSO <sub>4</sub> ]   | 0.23503 |
| 94  | 1-propyl-2,3-dimethyl imidazolium ethyl sulfate  | [PMM'Im][EtSO <sub>4</sub> ]  | 0.23328 |
| 95  | 1-propyl-2,3-dimethyl imidazolium methyl sulfate | [PMM'Im][MeSO <sub>4</sub> ]  | 0.23213 |
| 96  | 1-butyl-1-methyl pyrrolidinium propionate        | [BMPyr][C <sub>2</sub> COO]   | 0.22858 |
| 97  | 1-ethyl-3-methyl pyridinium methyl sulfate       | [EMPyr][MeSO <sub>4</sub> ]   | 0.22407 |
| 97  | 1-butyl-3-methyl pyridinium methyl sulfate       | [BMPyr][MeSO <sub>4</sub> ]   | 0.22407 |
| 99  | 1-butyl-1-methyl pyrrolidinium Butyrate          | [BMPyr][C <sub>3</sub> COO]   | 0.22272 |
| 100 | 1,3-diethyl imidazolium methyl sulfate           | [EE'Im][MeSO <sub>4</sub> ]   | 0.22251 |
| 101 | 1,3-dimethyl imidazolium methyl sulfate          | [MM'Im][MeSO <sub>4</sub> ]   | 0.22197 |
| 102 | 1-propyl-3-methyl imidazolium acetate            | [PMIm][OAc]                   | 0.21535 |
| 103 | 1-butyl-4-methyl pyridinium acetate              | [B4MPyr][OAc]                 | 0.21429 |
| 104 | 1,3-dimethyl imidazolium acetate                 | [MM'Im][OAc]                  | 0.21065 |
| 105 | 1-butyl-4-methyl pyridinium propionate           | [B4MPyr][EtSO <sub>4</sub> ]  | 0.21006 |
| 106 | 1-butyl-4-methyl pyridinium methyl sulfate       | [B4MPyr][MeSO <sub>4</sub> ]  | 0.20936 |
| 107 | 1-ethyl-3-methyl pyridinium ethyl sulfate        | [EMPyr][EtSO <sub>4</sub> ]   | 0.20873 |
| 108 | 1-butyl-3-methyl pyridinium butyrate             | [B3MPyr][C <sub>3</sub> COO]  | 0.20860 |
| 109 | 1,3-dimethyl pyridinium methyl sulfate           | [MM'Pyr][MeSO <sub>4</sub> ]  | 0.20758 |
| 110 | 1-methyl-3-propyl pyridinium propionate          | [MPPyr][C <sub>2</sub> COO]   | 0.20667 |
| 111 | 1,3-dimethyl imidazolium propionate              | [MM'Im][C <sub>2</sub> COO]   | 0.20642 |
| 112 | 1-ethyl imidazolium acetate                      | [EIm][OAc]                    | 0.20572 |
| 113 | 1-ethyl-1-methyl pyrrolidinium ethyl sulfate     | [EMPyr][EtSO <sub>4</sub> ]   | 0.20566 |
| 114 | 1-propyl-3-methyl imidazolium butyrate           | [PMIm][C <sub>3</sub> COO]    | 0.20526 |
| 115 | 1-methyl imidazolium acetate                     | [MIm][OAc]                    | 0.20519 |
| 116 | 1,1-dimethyl pyrrolidinium methyl sulfate        | [MM'Pyr][MeSO <sub>4</sub> ]  | 0.20450 |
| 117 | 1-ethyl pyridinium ethyl sulfate                 | [Epyr][EtSO <sub>4</sub> ]    | 0.20445 |
| 118 | 1-butyl-4-methyl pyridinium butyrate             | [B4MPyr][C <sub>3</sub> COO]  | 0.20420 |
| 119 | 1,1,3,3-tetramethyl guanidinium acetate          | [TMG][OAc]                    | 0.20383 |
| 120 | 1-methyl pyridinium methyl sulfate               | [MPyr][MeSO <sub>4</sub> ]    | 0.20330 |
| 121 | 1-butyl-2-methyl pyridinium acetate              | [B2MPyr][OAc]                 | 0.20262 |
| 122 | 1-methyl-3-propyl pyridinium butyrate            | [MPPyr][C <sub>3</sub> COO]   | 0.20081 |
| 123 | 1,3-dimethyl imidazolium butyrate                | [MM'Im][C <sub>3</sub> COO]   | 0.20057 |
| 124 | 1,1,3,3-tetramethyl guanidinium propionate       | [TMG][C <sub>2</sub> COO]     | 0.19960 |

|     |                                                         |                                                          |         |
|-----|---------------------------------------------------------|----------------------------------------------------------|---------|
| 125 | 1,1,3,3-tetramethyl guanidinium butyrate                | [TMG][C <sub>3</sub> COO]                                | 0.19374 |
| 126 | 1-butyl pyridinium acetate                              | [Bpyr][OAc]                                              | 0.19258 |
| 127 | 1-ethyl-3-methyl pyridinium acetate                     | [EMPyr][OAc]                                             | 0.19079 |
| 128 | 1-ethyl pyridinium acetate                              | [Epyr][OAc]                                              | 0.18987 |
| 129 | 1-butyl pyridinium propionate                           | [Bpyr][C <sub>2</sub> COO]                               | 0.18836 |
| 130 | 1-methyl pyrrolidinium acetate                          | [MPyr][OAc]                                              | 0.18771 |
| 131 | 1-ethyl-3-methyl pyridinium propionate                  | [EMPyr][C <sub>2</sub> COO]                              | 0.18657 |
| 132 | Pyridinium acetate                                      | [Pyr][OAc]                                               | 0.18652 |
| 133 | 1-ethyl pyridinium propionate                           | [Epyr][C <sub>2</sub> COO]                               | 0.18565 |
| 134 | 1-butyl-1-methyl pyrrolidinium methane sul-<br>fonate   | [BMPyr][CH <sub>3</sub> SO <sub>3</sub> ]                | 0.18553 |
| 135 | 1-ethyl-3-methyl imidazolium butyrate                   | [EMIm][C <sub>3</sub> COO]                               | 0.18515 |
| 136 | 1-Methyl-2-pyrrolidinium propionate                     | [MPyr][C <sub>2</sub> COO]                               | 0.18350 |
| 137 | 1-butyl-1-methyl pyrrolidinium ethane sulfonate         | [BMPyr][C <sub>2</sub> H <sub>5</sub> SO <sub>3</sub> ]  | 0.18336 |
| 138 | 1-butyl pyridinium butyrate                             | [Bpyr][C <sub>3</sub> COO]                               | 0.18250 |
| 139 | Pyridinium propionate                                   | [Pyr][C <sub>2</sub> COO]                                | 0.18229 |
| 140 | 1-ethyl-3-methyl pyridinium butyrate                    | [E3MPyr][C <sub>3</sub> COO]                             | 0.18071 |
| 141 | 1-ethyl pyridinium butyrate                             | [Epyr][C <sub>3</sub> COO]                               | 0.17979 |
| 142 | 1-butyl-3-methyl pyridinium methane sulfonate           | [BMPyr][CH <sub>3</sub> SO <sub>3</sub> ]                | 0.17141 |
| 143 | 1-butyl-3-methyl pyridinium ethane sulfonate            | [BMPyr][C <sub>2</sub> H <sub>5</sub> SO <sub>3</sub> ]  | 0.16923 |
| 144 | 1-propyl-3-methyl imidazolium methane sul-<br>fonate    | [PMIm][CH <sub>3</sub> SO <sub>3</sub> ]                 | 0.16808 |
| 145 | 1-butyl-4-methyl pyridinium methane sulfonate           | [BM4Pyr][CH <sub>3</sub> SO <sub>3</sub> ]               | 0.16702 |
| 146 | 1-propyl-3-methyl imidazolium ethane sulfonate          | [PMIm][C <sub>2</sub> H <sub>5</sub> SO <sub>3</sub> ]   | 0.16590 |
| 147 | 1-butyl-2,3-dimethyl imidazolium methane sul-<br>fonate | [BMM'Im][CH <sub>3</sub> SO <sub>3</sub> ]               | 0.16574 |
| 148 | 1,1,3,3-tetramethyl guanidinium bisulfate               | [TMG][HSO <sub>4</sub> ]                                 | 0.16534 |
| 149 | 1-butyl-4-methyl pyridinium ethane sulfonate            | [B4MPyr][CH <sub>3</sub> SO <sub>3</sub> ]               | 0.16484 |
| 150 | 1-propyl-3-methyl pyridinium methane<br>sulfonate       | [PMPyr][CH <sub>3</sub> SO <sub>3</sub> ]                | 0.16362 |
| 150 | 1-methyl-3-propyl pyridinium methane<br>sulfonate       | [MPPyr][CH <sub>3</sub> SO <sub>3</sub> ]                | 0.16362 |
| 152 | 1-butyl-2,3-dimethyl imidazolium ethane<br>sulfonate    | [BMM'Im][C <sub>2</sub> H <sub>5</sub> SO <sub>3</sub> ] | 0.16356 |
| 153 | 2-hydroxyethyl ammonium propionate                      | 2-HEAP                                                   | 0.16236 |
| 154 | 1-ethyl-2,3-dimethyl imidazolium methane<br>sulfonate   | [EMM'Im][CH <sub>3</sub> SO <sub>3</sub> ]               | 0.16210 |
| 155 | 1-propyl-3-methyl pyridinium ethane sulfonate           | [PMPyr][C <sub>2</sub> H <sub>5</sub> SO <sub>3</sub> ]  | 0.16145 |
| 155 | 1-methyl-3-propyl pyridinium ethane sulfonate           | [MPPyr][C <sub>2</sub> H <sub>5</sub> SO <sub>3</sub> ]  | 0.16145 |
| 157 | 1,3-dimethyl imidazolium ethane sulfonate               | [MM'Im][C <sub>2</sub> H <sub>5</sub> SO <sub>3</sub> ]  | 0.16120 |
| 158 | Formaldehyde                                            | [HCHO]                                                   | 0.15802 |
| 159 | 1,1,3,3-tetramethyl guanidinium methane<br>sulfonate    | [TMG][CH <sub>3</sub> SO <sub>3</sub> ]                  | 0.15656 |
| 160 | 1-butyl-2-methyl pyridinium methane<br>sulfonate        | [B2MPyr][CH <sub>3</sub> SO <sub>3</sub> ]               | 0.15535 |
| 161 | 1,1,3,3-tetramethyl guanidinium ethane<br>sulfonate     | [TMG][C <sub>2</sub> H <sub>5</sub> SO <sub>3</sub> ]    | 0.15438 |



|     |                                                   |                                                          |         |
|-----|---------------------------------------------------|----------------------------------------------------------|---------|
| 162 | 1-butyl-2-methyl pyridinium ethane sulfonate      | [B2MPyr][C <sub>2</sub> H <sub>5</sub> SO <sub>3</sub> ] | 0.15318 |
| 163 | 1-butyl-3-methyl imidazolium butyrate             | [BMIm][C <sub>3</sub> COO]                               | 0.15014 |
| 164 | 1-ethyl-3-methyl pyridinium methane sulfonate     | [EMPyr][CH <sub>3</sub> SO <sub>3</sub> ]                | 0.14352 |
| 165 | 1-butyl pyridinium ethane sulfonate               | [BPyr][C <sub>2</sub> H <sub>5</sub> SO <sub>3</sub> ]   | 0.14313 |
| 166 | 1-ethyl pyridinium methane sulfonate              | [Epyr][CH <sub>3</sub> SO <sub>3</sub> ]                 | 0.14261 |
| 167 | 1-ethyl-3-methyl pyridinium ethane sulfonate      | [EMPyr][C <sub>2</sub> H <sub>5</sub> SO <sub>3</sub> ]  | 0.14135 |
| 168 | 1-ethyl pyridinium ethane sulfonate               | [Epyr][C <sub>2</sub> H <sub>5</sub> SO <sub>3</sub> ]   | 0.14043 |
| 169 | 1-ethyl-3-methyl imidazolium ethyl sulfate        | [EMIm][EtSO <sub>4</sub> ]                               | 0.13865 |
| 170 | 1,3-diethyl imidazolium ethyl sulfate             | [EE'Im][EtSO <sub>4</sub> ]                              | 0.12095 |
| 171 | 1,3-dimethyl imidazolium methane sulfonate        | [MM'Im][CH <sub>3</sub> SO <sub>3</sub> ]                | 0.11622 |
| 172 | 1-ethyl-3-methyl imidazolium methyl sulfate       | [EMIm][MeSO <sub>4</sub> ]                               | 0.11466 |
| 173 | 1-ethyl-2,3-dimethyl imidazolium ethane sulfonate | [EMM'Im][C <sub>2</sub> H <sub>5</sub> SO <sub>3</sub> ] | 0.11393 |
| 174 | 1-butyl-3-methyl imidazolium ethane sulfonate     | [BMIm][C <sub>2</sub> H <sub>5</sub> SO <sub>3</sub> ]   | 0.11077 |
| 175 | 1-ethyl-3-methyl imidazolium methane sulfonate    | [EMIm][CH <sub>3</sub> SO <sub>3</sub> ]                 | 0.10899 |
| 176 | 1-ethyl-3-methyl imidazolium bisulfate            | [EMIm][HSO <sub>4</sub> ]                                | 0.10828 |
| 177 | 1-ethyl-3-methyl imidazolium acetate              | [EMIm][OAc]                                              | 0.10728 |
| 178 | 1-methyl imidazolium hydrogen sulfate             | [MIm][HSO <sub>4</sub> ]                                 | 0.10711 |
| 179 | 1-butyl-3-methyl imidazolium methane sulfonate    | [BMIm][CH <sub>3</sub> SO <sub>3</sub> ]                 | 0.10621 |
| 180 | 1,2,3-trimethyl imidazolium methyl sulfate        | [MM'M'Im][MeSO <sub>4</sub> ]                            | 0.10492 |
| 181 | 1-ethyl-3-methyl imidazolium ethane sulfonate     | [EMIm][C <sub>2</sub> H <sub>5</sub> SO <sub>3</sub> ]   | 0.10270 |
| 182 | Acetic acid                                       | [CH <sub>3</sub> COOH]                                   | 0.09746 |
| 183 | butanol                                           | [BuOH]                                                   | 0.09710 |
| 184 | 1-butyl-3-methyl imidazolium acetate              | [BMIm][OAc]                                              | 0.09453 |
| 185 | 1-butyl-3-methyl imidazolium bisulfate            | [BMIm][HSO <sub>4</sub> ]                                | 0.08245 |
| 186 | 1-ethyl-2,3-dimethyl imidazolium ethyl sulfate    | [EMM'Im][EtSO <sub>4</sub> ]                             | 0.08120 |
| 187 | 1-ethyl-3-methyl imidazolium propionate           | [EMIm][C <sub>2</sub> COO]                               | 0.07818 |
| 188 | 1,3-dimethyl imidazolium ethyl sulfate            | [MM'Im][EtSO <sub>4</sub> ]                              | 0.07193 |
| 189 | ethanolamine                                      | [EtNH <sub>2</sub> ]                                     | 0.06912 |

**Supplementary Materials:** The following are available online at [www.mdpi.com/xxx/s1](http://www.mdpi.com/xxx/s1), Table S1: Table lists the HF-ILs that were studied for analysis in this work and their corresponding raw materials, Table S2: Criteria, parameters describing the ionic liquids along with their weighting factors, Table S3: Table showing the results of TOPSIS analysis for raw materials, comparison with traditional organic solvents and ionic liquids combined with sensitivity analysis for changes in range of  $\pm 10\%$ . For the sake of brevity, the relative closeness to the ideal solution, ranking, ranking difference for  $\pm 10\%$  sensitivity changes are represented separately. Table S4: Overall ranking of the halide free ILs

**Author Contributions:** K.K.M. wrote the draft paper and S.P. reviewed the draft and provided supervision. All authors have read and agreed to the published version of the manuscript.

**Funding:** This research has received funding from the European Union's Horizon 2020 research and innovation program under the Marie Skłodowska-Curie grant agreement No.885793. A full fee waiver on APC was granted for this article to be published in Processes.

**Institutional Review Board Statement:** Not applicable

**Informed Consent Statement:** Not applicable

**Data Availability Statement:** Not applicable

**Conflicts of Interest:** The authors declare no conflict of interest.

## References

- Costa, S.P.F.; Azevedo, A.M.O.; Pinto, P.C.A.G.; Saraiva, M.L.M.F.S. Environmental Impact of Ionic Liquids: Recent Advances in (Eco)toxicology and (Bio)degradability. *ChemSusChem* **2017**, *10*, 2321–2347, doi:10.1002/cssc.201700261.
- Moodley, K.; Arumugam, V.; Ogundele, O.; Xu, H.; Redhi, G.; Gao, Y. Thermophysical and thermodynamic properties of binary liquid systems of [BMIM][MeSO<sub>4</sub>] ionic liquid with carboxylic acids. *Indian J. Chem. -Section A* **2020**, *59*, 1136–1147.
- Xu, A.; Wang, F. Carboxylate ionic liquid solvent systems from 2006 to 2020: Thermal properties and application in cellulose processing. *Green Chem.* **2020**, *22*, 7622–7664, doi:10.1039/d0gc02840a.
- González, B.; Gómez, E.; Domínguez, A.; Vilas, M.; Tojo, E. Physicochemical characterization of new sulfate ionic liquids. *J. Chem. Eng. Data* **2011**, *56*, 14–20, doi:10.1021/je1006357.
- Wu, T.Y.; Su, S.G.; Gung, S.T.; Lin, M.W.; Lin, Y.C.; Lai, C.A.; Sun, I.W. Ionic liquids containing an alkyl sulfate group as potential electrolytes. *Electrochim. Acta* **2010**, *55*, 4475–4482, doi:10.1016/j.electacta.2010.02.089.
- Calvar, N.; Gómez, E.; González, B.; Domínguez, Á. Experimental vapor-liquid equilibria for the ternary system ethanol + water + 1-ethyl-3-methylpyridinium ethylsulfate and the corresponding binary systems at 101.3 kPa: Study of the effect of the cation. *J. Chem. Eng. Data* **2010**, *55*, 2786–2791, doi:10.1021/je900998f.
- Shekaari, H.; Armanfar, E. Physical properties of aqueous solutions of ionic liquid, 1-propyl-3-methylimidazolium methyl sulfate, at T = (298.15 to 328.15) K. *J. Chem. Eng. Data* **2010**, *55*, 765–772, doi:10.1021/je900457z.
- Gómez, E.; Calvar, N.; Domínguez, Á.; MacEdo, E.A. Synthesis and temperature dependence of physical properties of four pyridinium-based ionic liquids: Influence of the size of the cation. *J. Chem. Thermodyn.* **2010**, *42*, 1324–1329, doi:10.1016/j.jct.2010.05.011.
- González, B.; Calvar, N.; Gómez, E.; Domínguez, I.; Domínguez, Á. Synthesis and physical properties of 1-ethylpyridinium ethylsulfate and its binary mixtures with ethanol and 1-propanol at several temperatures. *J. Chem. Eng. Data* **2009**, *54*, 1353–1358, doi:10.1021/je800981d.
- Gómez, E.; González, B.; Calvar, N.; Domínguez, Á. Excess molar properties of ternary system (ethanol + water + 1,3-dimethylimidazolium methylsulphate) and its binary mixtures at several temperatures. *J. Chem. Thermodyn.* **2008**, *40*, 1208–1216, doi:10.1016/j.jct.2008.04.006.
- González, B.; Calvar, N.; Gómez, E.; Domínguez, Á. Physical properties of the ternary system (ethanol + water + 1-butyl-3-methylimidazolium methylsulphate) and its binary mixtures at several temperatures. *J. Chem. Thermodyn.* **2008**, *40*, 1274–1281, doi:10.1016/j.jct.2008.03.013.
- Pereiro, A.B.; Verdía, P.; Tojo, E.; Rodríguez, A. Physical properties of 1-butyl-3-methylimidazolium methyl sulfate as a function of temperature. *J. Chem. Eng. Data* **2007**, *52*, 377–380, doi:10.1021/je060313v.
- Holbrey, J.D.; Reichert, W.M.; Swatoski, R.P.; Broker, G.A.; Pitner, W.R.; Seddon, K.R.; Rogers, R.D. Efficient, halide free synthesis of new, low cost ionic liquids: 1,3-dialkylimidazolium salts containing methyl- and ethyl-sulfate anions. *Green Chem.* **2002**, *4*, 407–413, doi:10.1039/b204469b.
- Boruah, K.; Borah, R. Design of Water Stable 1,3-Dialkyl- 2-Methyl Imidazolium Basic Ionic Liquids as Reusable Homogeneous Catalysts for Aza-Michael Reaction in Neat Condition. *ChemistrySelect* **2019**, *4*, 3479–3485, doi:10.1002/slct.201900187.
- Dong, L.; Zheng, D.X.; Wei, Z.; Wu, X.H. Synthesis of 1,3-dimethylimidazolium chloride and volumetric property investigations of its aqueous solution. *Int. J. Thermophys.* **2009**, *30*, 1480–1490, doi:10.1007/s10765-009-0651-x.
- Sashina, E.S.; Kashirskii, D.A.; Zaborski, M.; Jankowski, S. Synthesis and dissolving power of 1-Alkyl-3-methylpyridinium-based ionic liquids. *Russ. J. Gen. Chem.* **2012**, *82*, 1994–1998, doi:10.1134/S1070363212120158.
- Pandit, S.A.; Rather, M.A.; Bhat, S.A.; Rather, G.M.; Bhat, M.A. Influence of the Anion on the Equilibrium and Transport Properties of 1-Butyl-3-methylimidazolium Based Room Temperature Ionic Liquids. *J. Solution Chem.* **2016**, *45*, 1641–1658, doi:10.1007/s10953-016-0514-6.
- Lu, X.; Wu, D.; Ye, D.; Wang, Y.; Guo, Y.; Fang, W. Densities and Viscosities of Binary Mixtures of 2-Ethyl-1,1,3,3-tetramethylguanidinium Ionic Liquids with Ethanol and 1-Propanol. *J. Chem. Eng. Data* **2015**, *60*, 2618–2628, doi:10.1021/acs.jced.5b00259.
- Sashina, E.S.; Kashirskii, D.A.; Jankowski, S. PMR Study of Structural Features of Ionic Liquids Based on 1-Alkyl-3-Methylpyridinium and Mechanism of their Interaction with Cellulose. *Fibre Chem.* **2014**, *45*, 268–273, doi:10.1007/s10692-014-9525-5.
- Królikowska, M.; Lipiński, P.; Maik, D. Density, viscosity and phase equilibria study of {ethylsulfate-based ionic liquid + water} binary systems as a function of temperature and composition. *Thermochim. Acta* **2014**, *582*, 1–9, doi:10.1016/j.tca.2014.02.019.
- Ribeiro, M.C.C. High viscosity of imidazolium ionic liquids with the hydrogen sulfate anion: A Raman spectroscopy study. *J. Phys. Chem. B* **2012**, *116*, 7281–7290, doi:10.1021/jp302091d.
- Gurau, G.; Wang, H.; Qiao, Y.; Lu, X.; Zhang, S.; Rogers, R.D. Chlorine-free alternatives to the synthesis of ionic liquids for biomass processing. *Pure Appl. Chem.* **2012**, *84*, 745–754, doi:10.1351/PAC-CON-11-11-10.
- Guan, W.; Ma, X.X.; Li, L.; Tong, J.; Fang, D.W.; Yang, J.Z. Ionic parachor and its application in acetic acid ionic liquid homologue 1-alkyl-3-methylimidazolium acetate {[Cnmim][OAc](n = 2,3,4,5,6)}. *J. Phys. Chem. B* **2011**, *115*, 12915–12920, doi:10.1021/jp207882t.
- European Chemicals Agency Available online: <https://echa.europa.eu/information-on-chemicals/registered-substances> (accessed on Jul 23, 2021).
- National Center for Biotechnology Information. PubChem. Available online: <https://pubchem.ncbi.nlm.nih.gov/> (accessed on 23 July 2021).

- 
26. ChemSpider Available online: <https://www.chemspider.com/DataSources.aspx> (accessed on Jul 24, 2021).
  27. Bystrzanowska, M.; Tobiszewski, M. Assessment and design of greener deep eutectic solvents – A multicriteria decision analysis. *J. Mol. Liq.* **2021**, *321*, 114878, doi:10.1016/j.molliq.2020.114878.
  28. Bystrzanowska, M.; Pena-Pereira, F.; Marcinkowski, Ł.; Tobiszewski, M. How green are ionic liquids? – A multicriteria decision analysis approach. *Ecotoxicol. Environ. Saf.* **2019**, *174*, 455–458, doi:10.1016/j.ecoenv.2019.03.014.
  29. Mardani, A.; Jusoh, A.; MD Nor, K.; Khalifah, Z.; Zakwan, N.; Valipour, A. Multiple criteria decision-making techniques and their applications – a review of the literature from 2000 to 2014. *Econ. Res. Istraživanja* **2015**, *28*, 516–571, doi:10.1080/1331677X.2015.1075139.
  30. Huang, I.B.; Keisler, J.; Linkov, I. Multi-criteria decision analysis in environmental sciences: Ten years of applications and trends. *Sci. Total Environ.* **2011**, *409*, 3578–3594, doi:10.1016/j.scitotenv.2011.06.022.
  31. Hwang, C.-L.; Yoon, K. Methods for Multiple Attribute Decision Making. **1981**, 58–191, doi:10.1007/978-3-642-48318-9\_3.
  32. Yoon, K. A Reconciliation Among Discrete Compromise Solutions. *J. Oper. Res. Soc.* **1987**, *38*, 277–286, doi:10.1057/jors.1987.44.
  33. Hwang, C.-L.; Lai, Y.-J.; Liu, T.-Y. A new approach for multiple objective decision making. *Comput. Oper. Res.* **1993**, *20*, 889–899, doi:10.1016/0305-0548(93)90109-V.
  34. SCHER, SCENIHR. Toxicity and Assessment of Chemical Mixtures. Available online: <https://op.europa.eu/en/publication-detail/-/publication/ffab4074-6ce5-4f87-89b7-fbd438943b54/language-en> (accessed on Jul 25, 2021).
